# Supplementary material for: A novel prognostic biomarker LCP2 correlates with metastatic melanoma-infiltrating CD8+ T cells
Source: Springer Nature journal article supplement (doi:10.1038/s41598-021-88676-9), 2021-04-28
Supplement: MOESM1 [file 41598_2021_88676_MOESM1_ESM.pdf]

# **A novel prognostic biomarker *LCP2* correlates with metastatic melanoma-infiltrating CD8<sup>+</sup> T cells**

Zijun Wang<sup>1,2</sup>, Mou Peng<sup>3,4\*</sup>

<sup>1</sup> Institute of Dermatology, Chinese Academy of Medical Sciences and Peking Union Medical College, Nanjing, Jiangsu, China.

<sup>2</sup> Department of Dermatology, The Second Xiangya Hospital, Central South University, Changsha, Hunan, China.

<sup>3</sup> Department of Microbiology and Immunology, Albert Einstein College of Medicine, Bronx, New York.

<sup>4</sup> Department of Urology, The Second Xiangya Hospital, Central South University, Changsha, Hunan, China.

\*Corresponding Author

Mou Peng

Department of Urology,

The Second Xiangya Hospital, Central South University

No.139 Renmin Middle Rd, Changsha, Hunan 410011, China

Tel: 86-731-85295134

Fax: 86-731-85295134

Email: pengmou@csu.edu.cn

Supplementary Figure S1 The relationship between LCP2 expression with clinical characteristics of cutaneous melanoma. A. LCP2 was highly expressed in SKCM with metastasis compared to primary SKCM ( $p=1.93E-08$ ). B. There were no significant differences in patient's age in SKCM. C. LCP2 was over-expressed in SKCM with stage 1 and stage 3 compared to stage 2, respectively (stage 1 vs stage 2:  $P=2.422E-03$ , stage 2 vs stage 3:  $P=1.971E-05$ ). D&E&F. There were no significant differences in patient's gender (D), weight (E) and promoter methylation level of LCP2 in SKCM (F). SKCM: skin cutaneous melanoma.

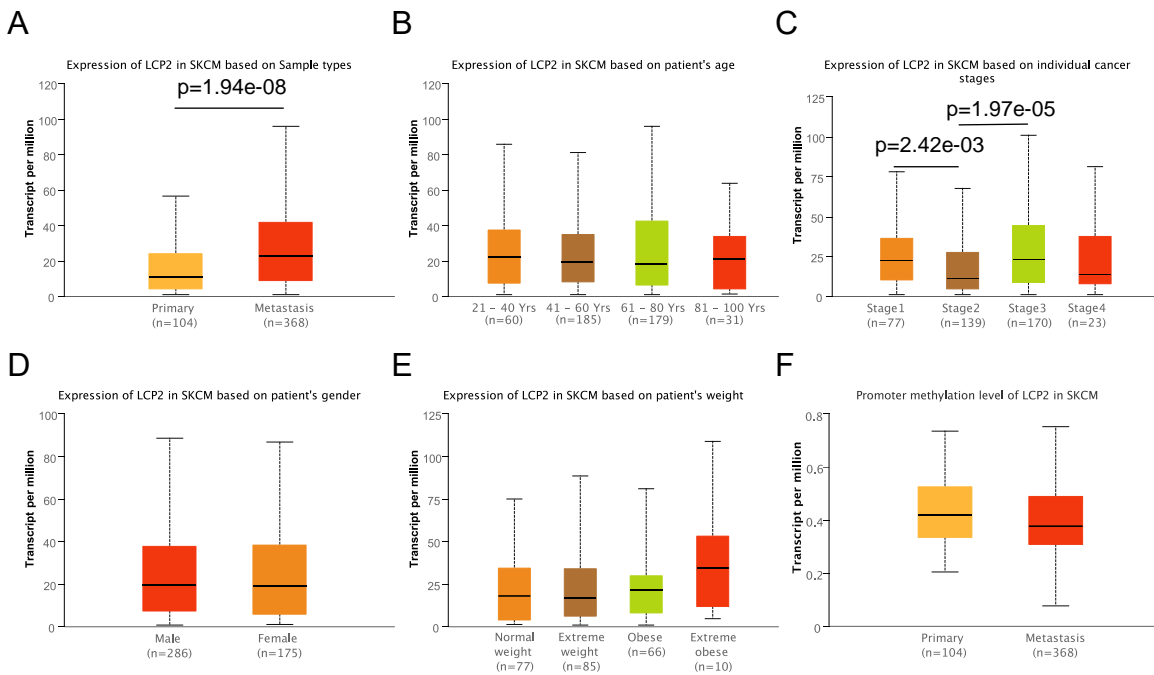

**Supplementary Figure S2** The *LCP2* expression was positively correlated with *HAVCR2*, *LAG3*, *TOX* and *TIGIT* in metastatic cutaneous melanoma.

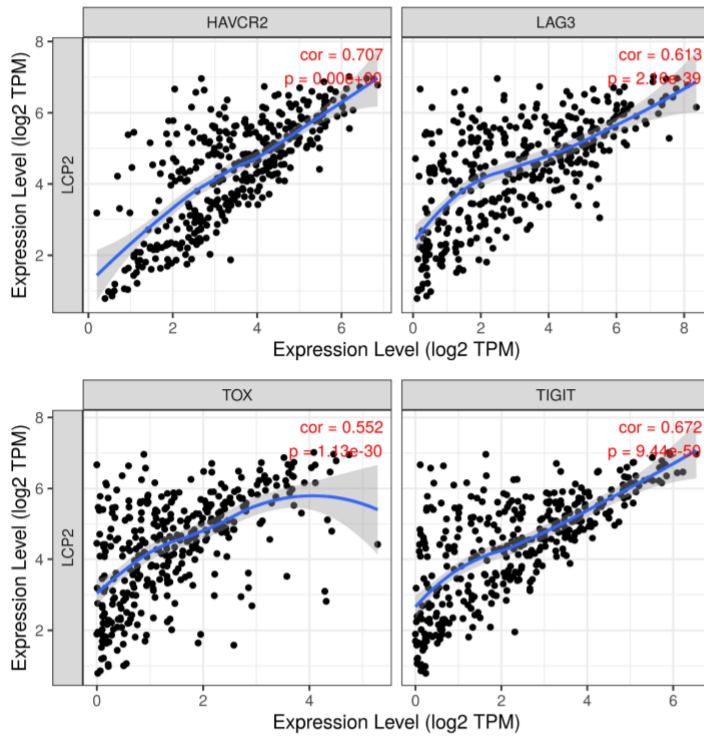

**Supplementary Figure S3** CIBERSORT analysis of 22 immune cells based on *LCP2* expression level in primary melanoma cohort. Significantly lower estimated fractions of resting NK cells existed in the high-*LCP2* expression group.

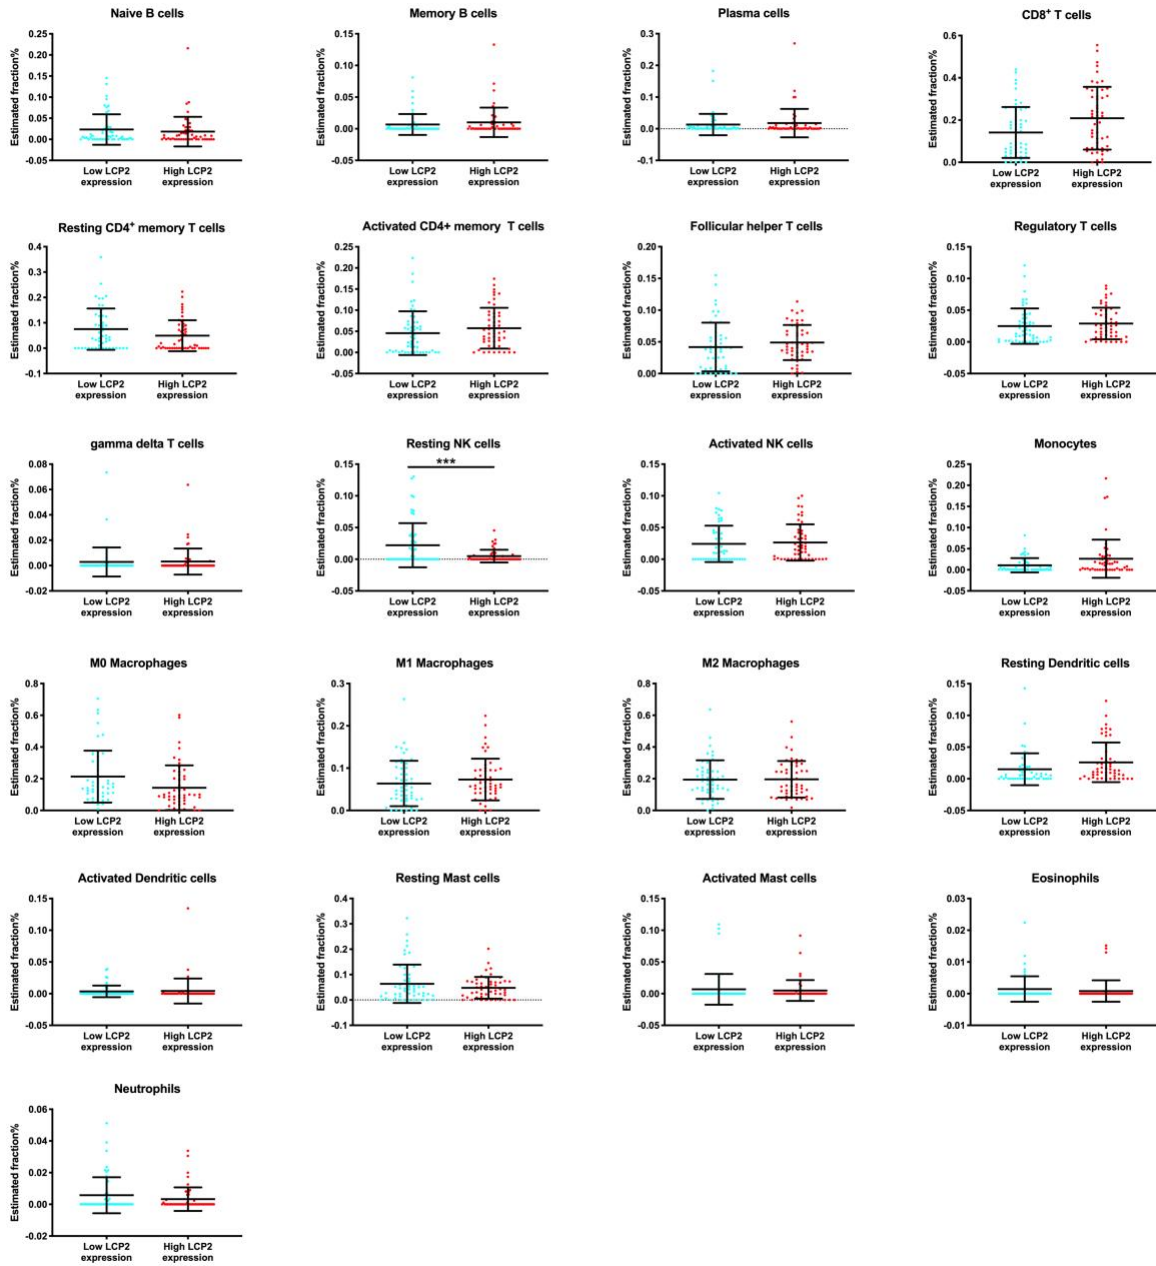

**Supplementary Figure S4** Kaplan-Meier curves of OS and PFS for low- and high-*LCP2* expression patients after anti-PD1 immunotherapy from Gide2019\_PD1+CTLA4 cohorts. OS: overall survival; PFS: progression-free survival.

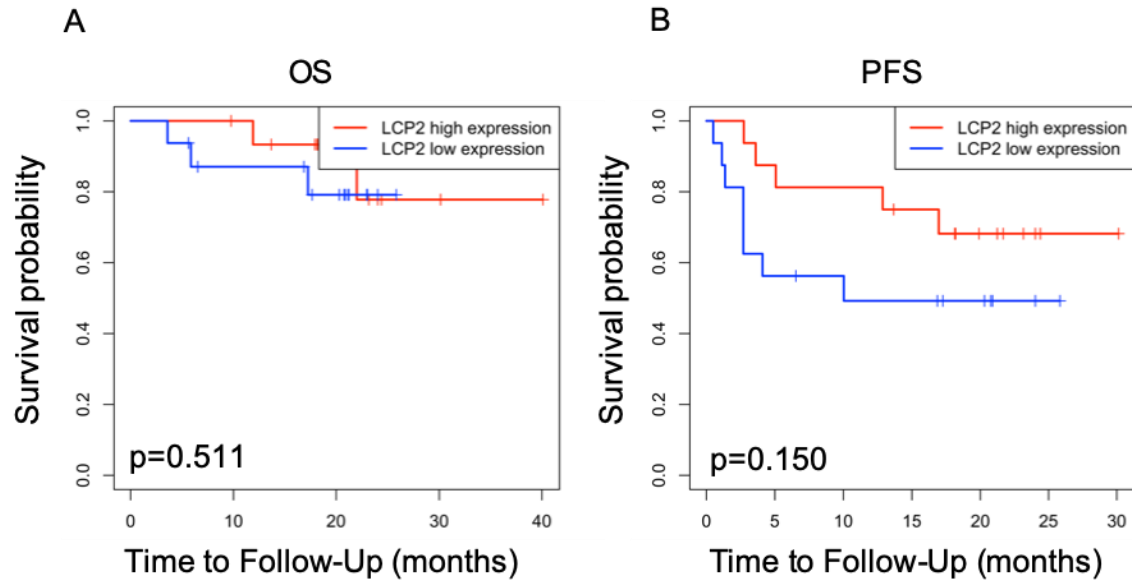

**Supplementary Table S1** The correlation between LCP2 and overall survival in pan-cancers

| cancer          | variable | p-value          |
|-----------------|----------|------------------|
| SKCM            | LCP2     | <b>1.192E-05</b> |
| SKCM-Metastasis | LCP2     | <b>2.205E-05</b> |
| UVM             | LCP2     | <b>1.466E-04</b> |
| LGG             | LCP2     | <b>5.174E-03</b> |
| UCEC            | LCP2     | <b>9.151E-03</b> |
| THYM            | LCP2     | <b>9.737E-03</b> |
| SARC            | LCP2     | <b>0.013</b>     |
| GBM             | LCP2     | <b>0.016</b>     |
| HNSC-HPVpos     | LCP2     | <b>0.019</b>     |
| THCA            | LCP2     | 0.069            |
| ESCA            | LCP2     | 0.081            |
| TGCT            | LCP2     | 0.085            |
| STAD            | LCP2     | 0.118            |
| READ            | LCP2     | 0.160            |
| BRCA-Her2       | LCP2     | 0.168            |
| LUSC            | LCP2     | 0.182            |
| CECSC           | LCP2     | 0.193            |
| LUAD            | LCP2     | 0.198            |
| BRCA            | LCP2     | 0.202            |
| PCPG            | LCP2     | 0.311            |
| OV              | LCP2     | 0.357            |
| SKCM-Primary    | LCP2     | 0.373            |
| CHOL            | LCP2     | 0.386            |
| BRCA-Luminal    | LCP2     | 0.400            |
| PAAD            | LCP2     | 0.413            |
| KICH            | LCP2     | 0.428            |
| MESO            | LCP2     | 0.505            |
| HNSC            | LCP2     | 0.552            |
| DLBC            | LCP2     | 0.637            |
| KIRP            | LCP2     | 0.665            |
| BLCA            | LCP2     | 0.719            |
| COAD            | LCP2     | 0.732            |
| HNSC-HPVneg     | LCP2     | 0.748            |
| PRAD            | LCP2     | 0.752            |
| ACC             | LCP2     | 0.812            |
| UCS             | LCP2     | 0.839            |
| LIHC            | LCP2     | 0.924            |
| KIRC            | LCP2     | 0.946            |
| BRCA-Basal      | LCP2     | 0.989            |

**Supplementary Table S2** *LCP2* correlated T cell co-signaling pathway genes in metastatic melanoma.

| <b><i>LCP2</i> correlated T cell co-signaling pathway genes</b> | <b>Correlation coefficient</b> | <b>p value</b> |
|-----------------------------------------------------------------|--------------------------------|----------------|
| <i>HLA-DRA</i>                                                  | 0.711                          | 5.50E-58       |
| <i>CD3E</i>                                                     | 0.656                          | 0              |
| <i>CD80</i>                                                     | 0.673                          | 6.61E-50       |
| <i>CD86</i>                                                     | 0.726                          | 0              |
| <i>CD274</i>                                                    | 0.595                          | 1.29E-36       |
| <i>HHLA2</i>                                                    | 0.282                          | 3.71E-08       |
| <i>CD28</i>                                                     | 0.630                          | 0              |
| <i>ICOS</i>                                                     | 0.649                          | 2.28E-45       |
| <i>TMIGD2</i>                                                   | 0.456                          | 2.64E-20       |
| <i>PDCDILG2</i>                                                 | 0.680                          | 0              |
| <i>PDCD1</i>                                                    | 0.628                          | 0              |
| <i>BTLA</i>                                                     | 0.615                          | 1.06E-39       |
| <i>BTNL8</i>                                                    | 0.532                          | 2.70E-28       |
| <i>BTN3A1</i>                                                   | 0.513                          | 0              |
| <i>CD48</i>                                                     | 0.687                          | 0              |
| <i>SLAMF1</i>                                                   | 0.631                          | 2.86E-42       |
| <i>CD2</i>                                                      | 0.689                          | 0              |
| <i>CD244</i>                                                    | 0.572                          | 2.64E-33       |
| <i>TIMD4</i>                                                    | 0.580                          | 2.10E-34       |
| <i>HAVCR1</i>                                                   | 0.433                          | 3.00E-18       |
| <i>LGALS9</i>                                                   | 0.603                          | 0              |
| <i>HAVCR2</i>                                                   | 0.707                          | 0              |
| <i>CD226</i>                                                    | 0.612                          | 3.73E-39       |
| <i>TIGIT</i>                                                    | 0.672                          | 9.44E-50       |
| <i>LAIR1</i>                                                    | 0.700                          | 0              |
| <i>CD40</i>                                                     | 0.614                          | 0              |
| <i>TNFSF14</i>                                                  | 0.643                          | 2.77E-44       |
| <i>CD40LG</i>                                                   | 0.566                          | 1.64E-32       |
| <i>CD70</i>                                                     | 0.555                          | 4.08E-31       |
| <i>TNFSF8</i>                                                   | 0.667                          | 1.03E-48       |
| <i>TNFSF18</i>                                                  | 0.333                          | 5.61E-11       |
| <i>TNFRSF9</i>                                                  | 0.698                          | 5.24E-55       |
| <i>CD27</i>                                                     | 0.638                          | 1.76E-43       |
| <i>TNFRSF8</i>                                                  | 0.619                          | 2.39E-40       |
| <i>TNFRSF18</i>                                                 | 0.586                          | 0              |

**Supplementary S3** Univariate and multivariate analysis for evaluating the prognostic factors of progression-free survival in the Gide2019\_PD1 cohort

| Characteristics              | Hazard Ratio | univariate Cox analysis |      |              | multivariate Cox analysis |             |          |
|------------------------------|--------------|-------------------------|------|--------------|---------------------------|-------------|----------|
|                              |              |                         | CI95 | P. Value     | Hazard Ratio              | CI95        | P. Value |
| B_cells_memory               | 0.01         | 0-2.08                  |      | 0.088        |                           |             |          |
| B_cells_naive                | 0.43         | 0.01-21.35              |      | 0.673        |                           |             |          |
| Dendritic_cells_activated    | 0            | 0-116608.22             |      | 0.389        |                           |             |          |
| Dendritic_cells_resting      | 616.56       | 0.09-4400411.87         |      | 0.156        |                           |             |          |
| Eosinophils                  | 0.84         | 0-242.86                |      | 0.953        |                           |             |          |
| Macrophages_M0               | 0.23         | 0-35.89                 |      | 0.571        |                           |             |          |
| Macrophages_M1               | 0.02         | 0-28.22                 |      | 0.297        |                           |             |          |
| Macrophages_M2               | 5.38         | 0.19-150.69             |      | 0.323        |                           |             |          |
| Mast_cells_activated         | 2.07         | 0.01-659.52             |      | 0.804        |                           |             |          |
| Mast_cells_resting           | 48.83        | 2-1190.13               |      | <b>0.017</b> | 5.25                      | 0.16-177.53 | 0.356    |
| Monocytes                    | 0.15         | 0-1905.58               |      | 0.696        |                           |             |          |
| Neutrophils                  | 0.28         | 0.01-13.45              |      | 0.52         |                           |             |          |
| NK_cells_activated           | 2640.27      | 0.25-28153691.89        |      | 0.096        |                           |             |          |
| NK_cells_resting             | 0            | 0-7.98                  |      | 0.148        |                           |             |          |
| Plasma_cells                 | 0.23         | 0-20.91                 |      | 0.52         |                           |             |          |
| T_cells_CD4_memory_activated | 0            | 0-0.77                  |      | <b>0.04</b>  | 0                         | 0-2.07      | 0.081    |
| T_cells_CD4_memory_resting   | 14.99        | 0.22-1001.97            |      | 0.207        |                           |             |          |
| T_cells_CD4_naive            | 34.6         | 0.93-1281.24            |      | 0.054        |                           |             |          |
| T_cells_CD8                  | 0.01         | 0-0.73                  |      | <b>0.035</b> | 1.07                      | 0.01-92.45  | 0.977    |
| T_cells_follicular_helper    | 0            | 0-0.07                  |      | <b>0.016</b> | 0                         | 0-1.12      | 0.052    |
| T_cells_gamma_delta          | 0            | 0-6.71                  |      | 0.098        |                           |             |          |
| Tregs                        | 0.2          | 0-227.46                |      | 0.657        |                           |             |          |
| LCP2                         | 0.7          | 0.53-0.92               |      | <b>0.01</b>  | 0.98                      | 0.68-1.41   | 0.923    |

**Supplementary Table S4** Univariate and multivariate analysis for evaluating the prognostic factors of overall survival in the Gide2019\_PD1 cohort

| Characteristics              | univariate Cox analysis |                   |              | multivariate Cox analysis |            |          |
|------------------------------|-------------------------|-------------------|--------------|---------------------------|------------|----------|
|                              | Hazard Ratio            | CI95              | P. Value     | Hazard Ratio              | CI95       | P. Value |
| B_cells_memory               | 0.09                    | 0-21.91           | 0.391        |                           |            |          |
| B_cells_naive                | 0.55                    | 0.01-38.91        | 0.783        |                           |            |          |
| Dendritic_cells_activated    | 0                       | 0-220752.49       | 0.326        |                           |            |          |
| Dendritic_cells_resting      | 0.2                     | 0-11006.91        | 0.775        |                           |            |          |
| Eosinophils                  | 6.8                     | 0.02-2303.2       | 0.519        |                           |            |          |
| Macrophages_M0               | 0.37                    | 0-108.18          | 0.729        |                           |            |          |
| Macrophages_M1               | 0                       | 0-2.36            | 0.066        |                           |            |          |
| Macrophages_M2               | 5.84                    | 0.15-229.55       | 0.346        |                           |            |          |
| Mast_cells_activated         | 0.78                    | 0-249.34          | 0.933        |                           |            |          |
| Mast_cells_resting           | 52.33                   | 1.72-1589.3       | <b>0.023</b> | 14.94                     | 0.4-551.87 | 0.142    |
| Monocytes                    | 0.01                    | 0-5233.32         | 0.492        |                           |            |          |
| Neutrophils                  | 0.41                    | 0.01-24.41        | 0.67         |                           |            |          |
| NK_cells_activated           | 3257.01                 | 0.11-100517288.52 | 0.125        |                           |            |          |
| NK_cells_resting             | 0                       | 0-6.7             | 0.118        |                           |            |          |
| Plasma_cells                 | 0.37                    | 0-50.11           | 0.691        |                           |            |          |
| T_cells_CD4_memory_activated | 0                       | 0-1.69            | 0.072        |                           |            |          |
| T_cells_CD4_memory_resting   | 28.34                   | 0.22-3587.84      | 0.176        |                           |            |          |
| T_cells_CD4_naive            | 10.35                   | 0.2-527.33        | 0.244        |                           |            |          |
| T_cells_CD8                  | 0.02                    | 0-1.45            | 0.072        |                           |            |          |
| T_cells_follicular_helper    | 0                       | 0-0.41            | <b>0.037</b> | 0                         | 0-2.17     | 0.064    |
| T_cells_gamma_delta          | 0                       | 0-2.84            | 0.068        |                           |            |          |
| Tregs                        | 0.09                    | 0-506.65          | 0.58         |                           |            |          |
| LCP2                         | 0.76                    | 0.56-1.03         | 0.072        |                           |            |          |
